# Supplementary material
Source: PubMed Central journal article supplement (PMC4348780)
Supplement: supp_pp.114.255174_255174suppfigs.pdf [file supp_pp.114.255174_255174suppfigs.pdf]

**The Zinc Finger Transcription Factor *SIZFP2* Negatively Regulates Abscisic Acid Biosynthesis and Fruit Ripening in Tomato**

Lin Weng, Fangfang Zhao, Rong Li, Changjie Xu, Kunsong Chen, and Han Xiao

SUPPLEMENTAL MATERIALS

Fig. S1-S11

Table S1-S5

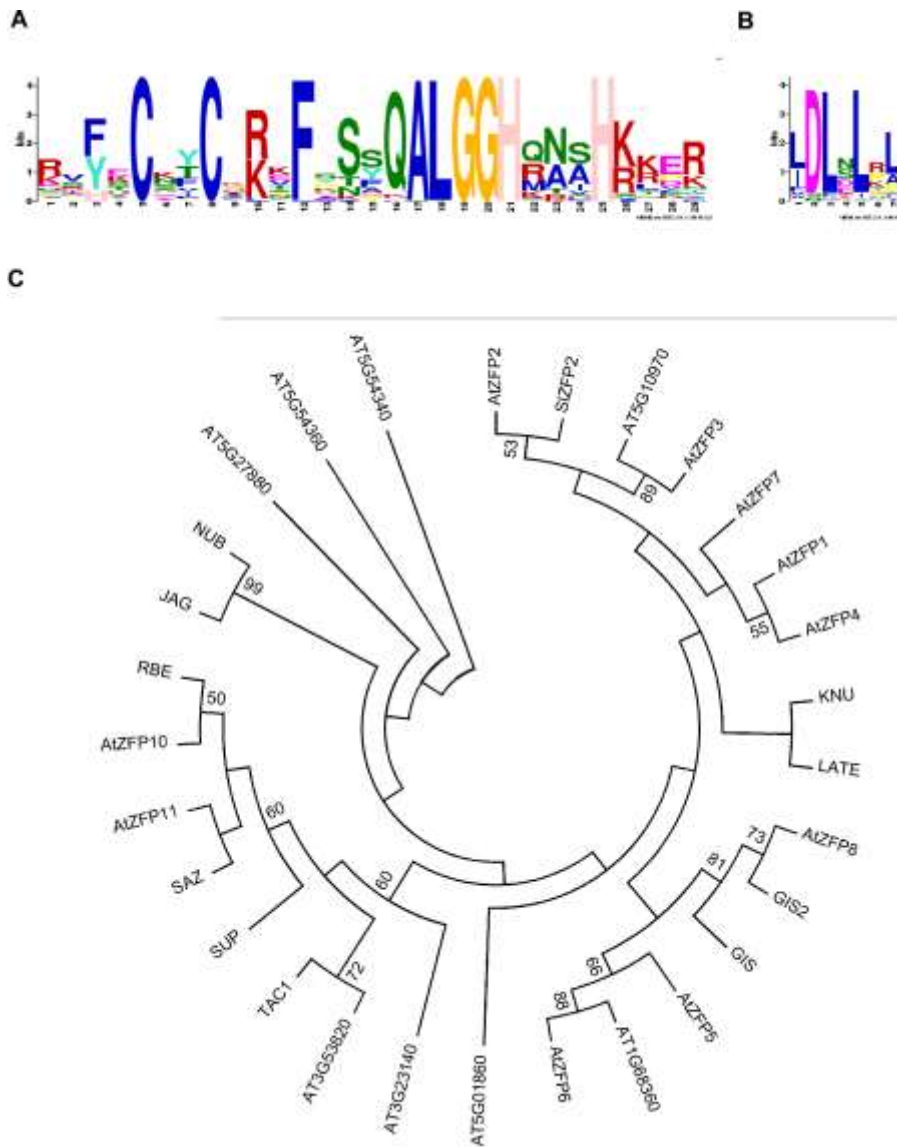

**Fig. S1** *SIZFP2* encodes a C<sub>2</sub>H<sub>2</sub>-type zinc finger protein mainly expressed in fruits

*SIZFP2* contains two conserved motifs -- C<sub>2</sub>H<sub>2</sub> zinc finger and EAR-like -- predicted by MEME program (Bailey et al., 2006, Nucl. Acids Res. **34**: W369-W373). (A) Weblog of C<sub>2</sub>H<sub>2</sub> zinc finger motif. (B) Weblog of EAR like motif 2. (C) Maximum parsimony tree of *SIZFP2* and its homologs from Arabidopsis by MEGA5 (Tamura et al., 2011, Mol Biol Evol **28**: 2731-2739). The bootstrap consensus tree was inferred from 1000 replicates using MEGA5. Branches corresponding to partitions reproduced in less than 50% bootstrap replicates are collapsed.

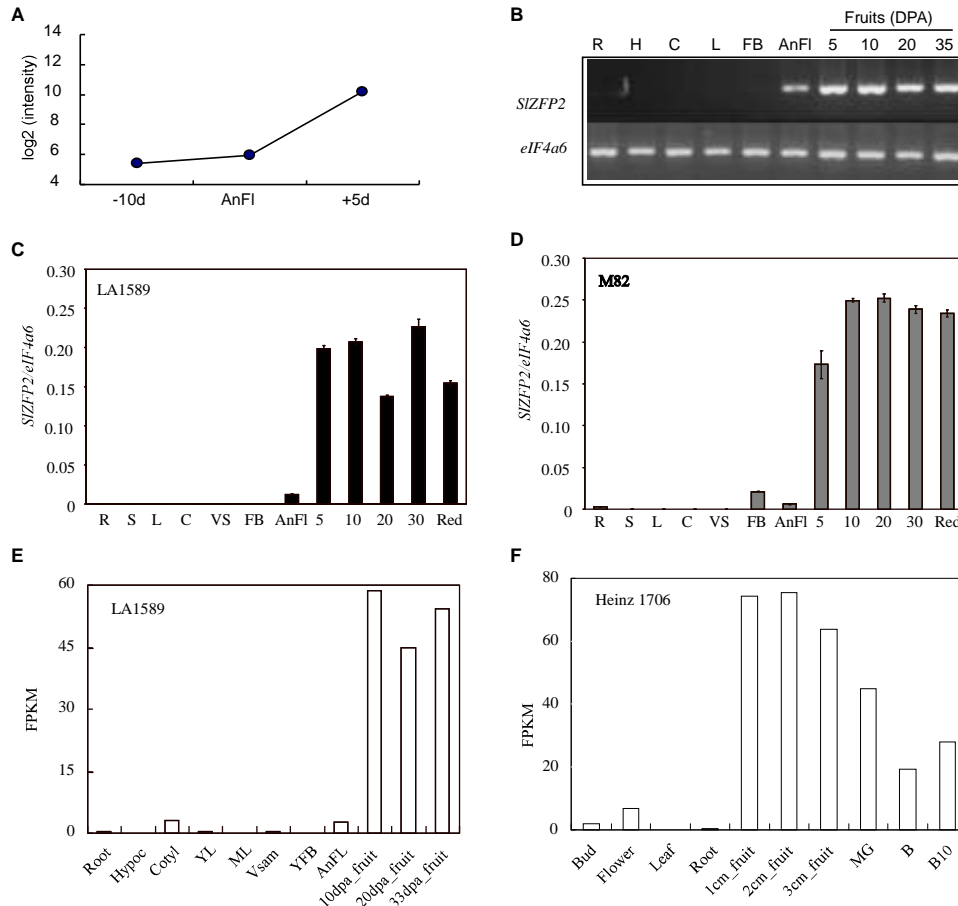

**Fig. S2** *SIZFP2* expression in various tissues revealed by RT-PCR, qRT-PCR, microarray and RNA-seq

(A) Expression of *SIZFP2* in flowers and fruits of LA1589. The expression values (log<sub>2</sub>) were from dataset previously described (Xiao et al 2009, BMC Plant Biol. 9,49). (B) RT-PCR analysis of *SIZFP2* expression in different tissues of LA1589. (C) qRT-PCR analysis of *SIZFP2* expression in different tissues of LA1589. (D) qRT-PCR analysis of *SIZFP2* in various tissues of M82. (E) *SIZFP2* expression in different tissues of LA1589 determined by RNA-seq. (F) *SIZFP2* expression in different tissues of Heinz1706 determined by RNA-seq. Expression value in (E) and (F) were from public database Tomato Functional Genomics Database (<http://ted.bti.cornell.edu/cgi-bin/TFGD/digital/home.cgi>. D006 and D004, respectively). The vegetative tissues, and flowers and fruits (in C and D) were collected from 7-10 days-old seedlings of two months-old plants, respectively. -10d, flower bud at 10 days preanthesis; AnFl, anthesis flower; +5d, 5 DPA fruit. C/Cotyl, cotyledon; FB, unopened flower; H/Hypocot, hypocotol; L, leaf; YL, young leaf; ML, mature leaf; R, Root; S, stem; VS/Vsam, vegetative shoot apex, YFB, young flower buds. FPKM, number of fragments per kilobase of transcript sequence per millions base pairs sequenced.

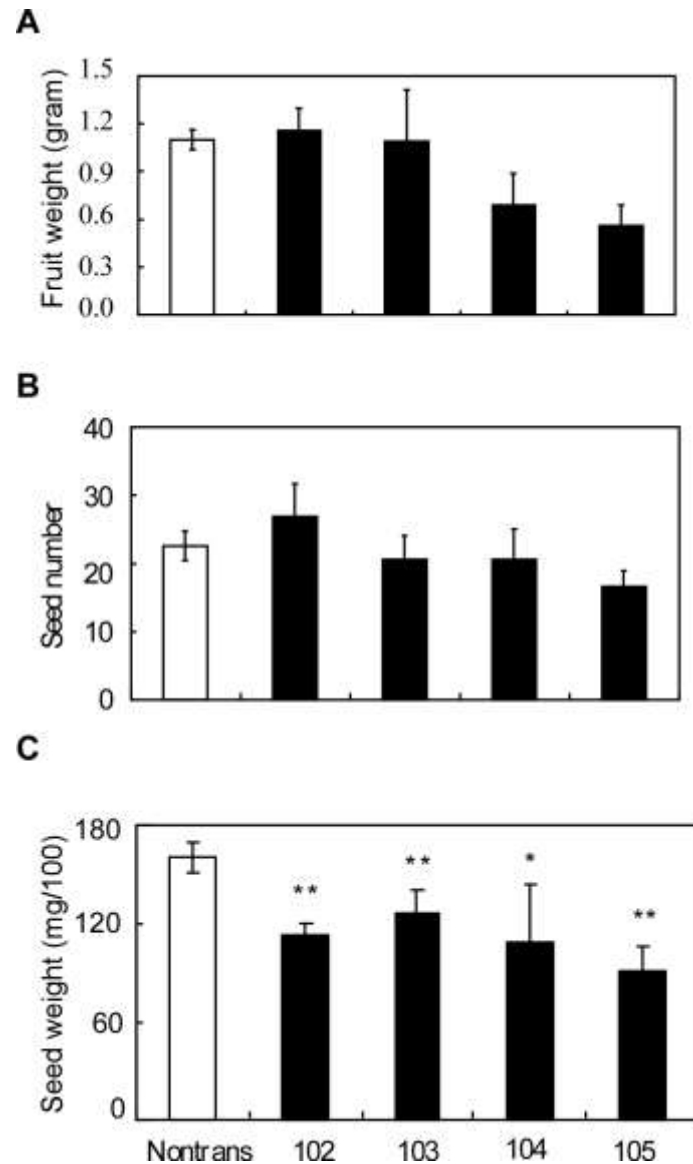

**Fig. S3 Fruit and seed morphology of *HA-SIZFP2* overexpression lines in LA1589 background**

(A) Fruit weight of *HA-SIZFP2* overexpression lines and their nontransgenic siblings. (B) Seed number of *HA-SIZFP2* overexpression lines and their nontransgenic siblings. (C) Seed weight of *HA-SIZFP2* overexpression lines and their nontransgenic siblings. 15-20 fruits per plant from total of five T2 plants for each line and nontransgenic sibling were used to measure fruit size, seed number and seed weight (100-seed). Statistical significance of *p*-values is based on Student's *t*-test. \*, *p*<0.05; \*\*, *p*<0.01. Data are means  $\pm$  SD.

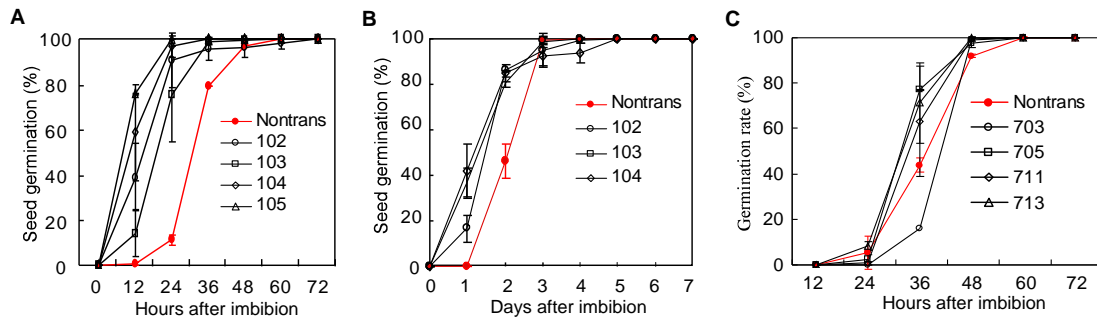

**Fig. S4 Seed germination of *SIZFP2* overexpression lines**

(A) Germination of freshly harvested seeds of four *HA-SIZFP2* overexpression lines from LA1589 and their nontransgenic siblings. (B) Germination of stored dry seeds of three *HA-SIZFP2* overexpression lines from LA1589 and their non-transgenic siblings. (C) Germination of stored dry seeds of *SIZFP2* overexpression lines and their non-transgenic siblings from LA1589. For each line, more than 150 seeds per line from total of three plants were tested and germination was based on radical emergence. Seeds (in B and C) have been stored for one month under at room temperature.

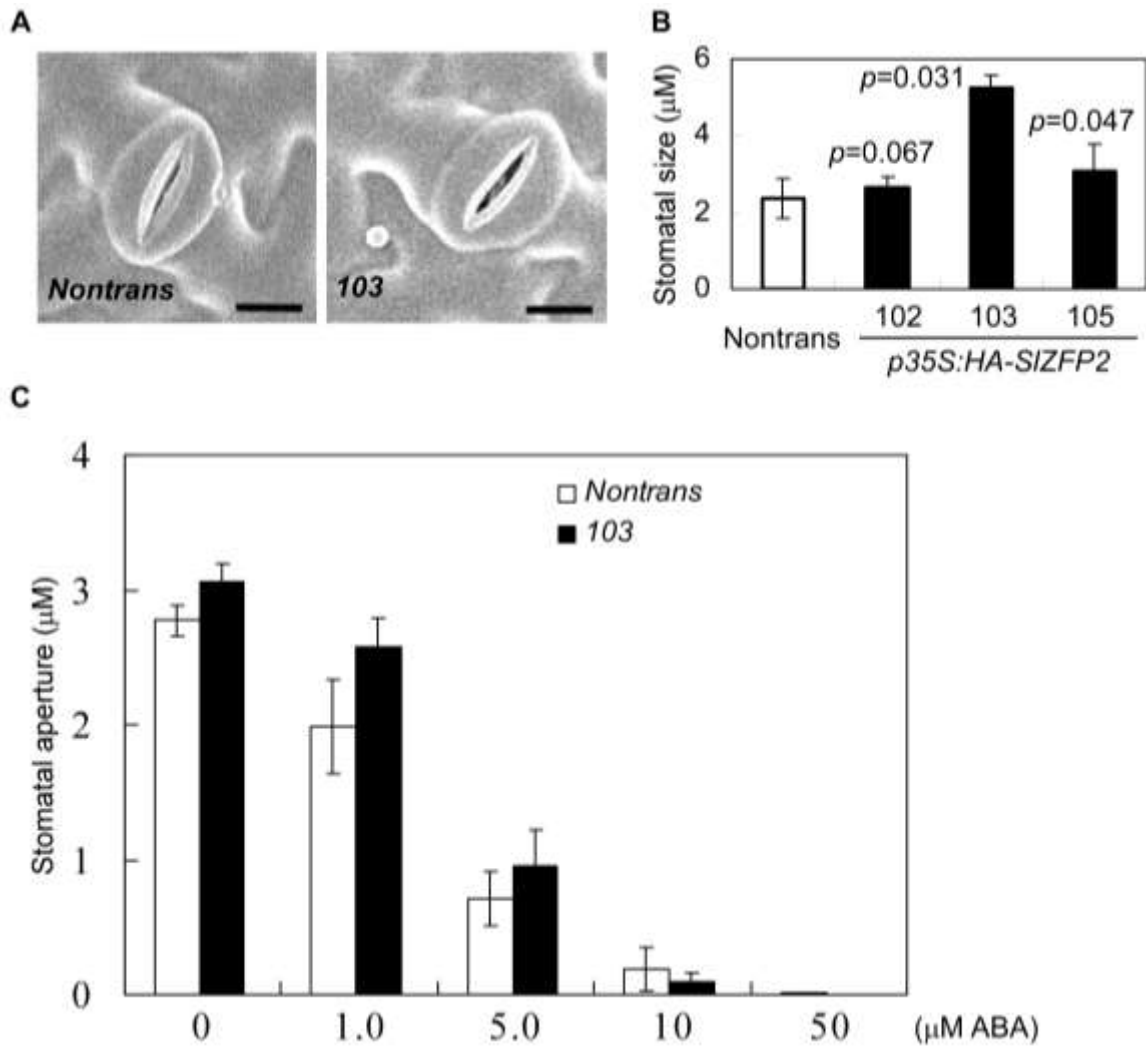

**Fig. S5 Overexpression of *HA-SIZFP2* affects stomata aperture**

(A) Representative stomata of a *HA-SIZFP2* overexpression line (103) from LA1589 and its nontransgenic sibling. The images were taken from leaves of plants grown in greenhouse under normal condition. (B) Quantification of stomata sizes for three *HA-SIZFP2* overexpression lines from and their nontransgenic siblings. At least 30 stomata per leaf were measured, and five leaves were taken from three plants per line. (C) Sensitivity of stomatal aperture to ABA. Statistical significance of *p*-values is based on Student's *t*-test.

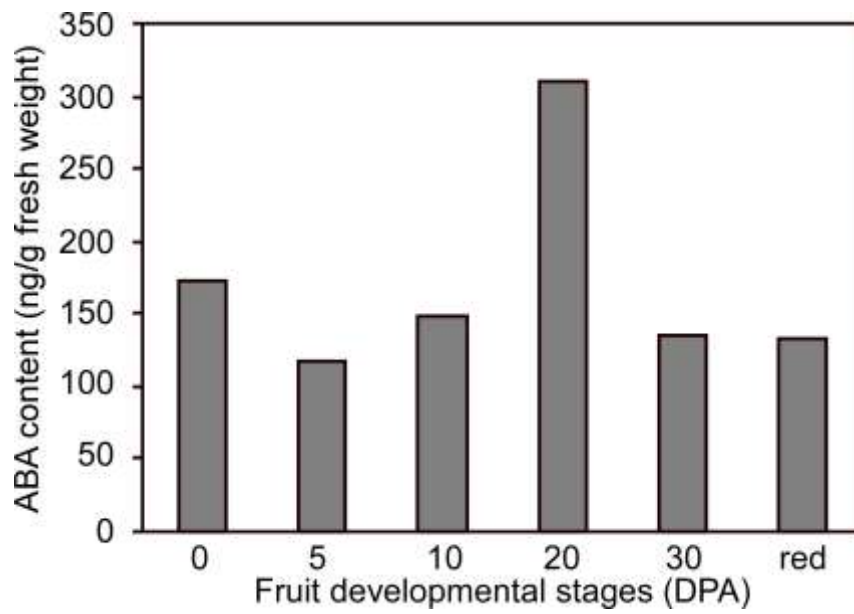

**Fig. S6 Changes of ABA levels in M82 fruits after pollination**

ABA was assayed on pooled 5-10 fruits per time point from 3-5 plants.

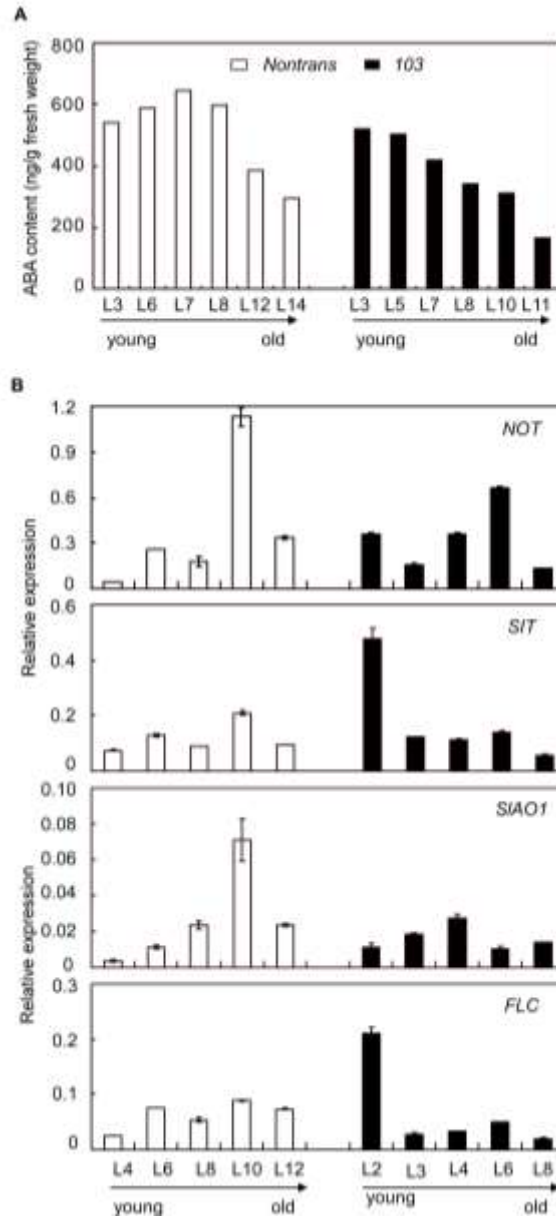

**Fig. S7 Repressed ABA biosynthesis in leaf by overexpression of HA-SIZFP2**

(A) ABA levels in the consecutive leaves of a representative transgenic line 103 overexpressing *HA-SIZFP2*. (B) Transcript levels of ABA biosynthetic genes in the consecutive leaves of the *HA-SIZFP2* overexpression line 103. ABA and total RNA was extracted from pooled five leaves of five plants at the same developmental stages (leaves at the same nodes). The plants were 45 days old with 12 and 16 leaves for the transgenic line and its nontransgenic sibling, respectively. Expression levels relative to *SleIF4a6* were determined by qRT-PCR. Data in Fig. S7B are means  $\pm$  SD.



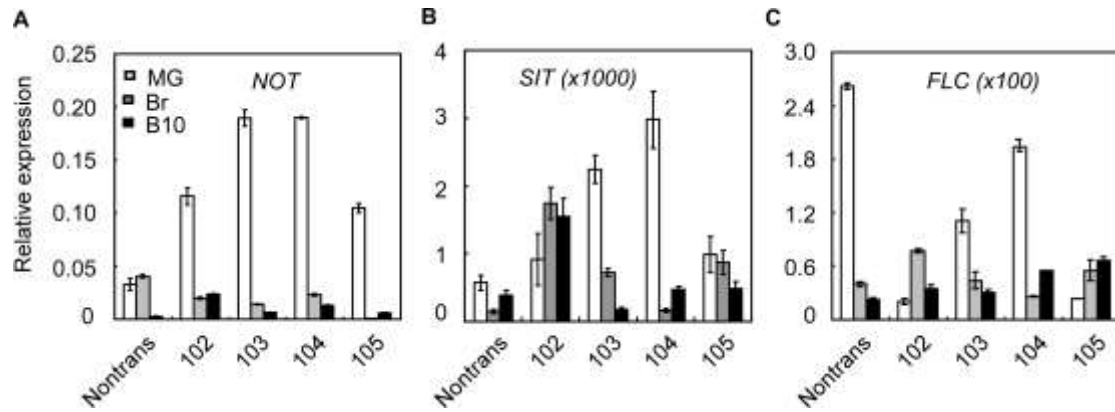

**Fig. S8 Transcript levels of ABA biosynthetic genes in maturing seeds overexpressing *HA-SIZFP2***

(A) *NOT* expression in seeds extracted from fruits at stages of mature green (MG), breaker (Br) and red ripen (B10, breaker plus 10 days). (B) *SIT* expression in seeds extracted from fruits at MG, Br and B10 stages. (C) *FLC* expression in seeds extracted from fruits at MG, Br and B10 stages. Expression relative to *SleIF4a6* was determined by qRT-PCR in three technical replicates. Data are means  $\pm$  SD, N=3.

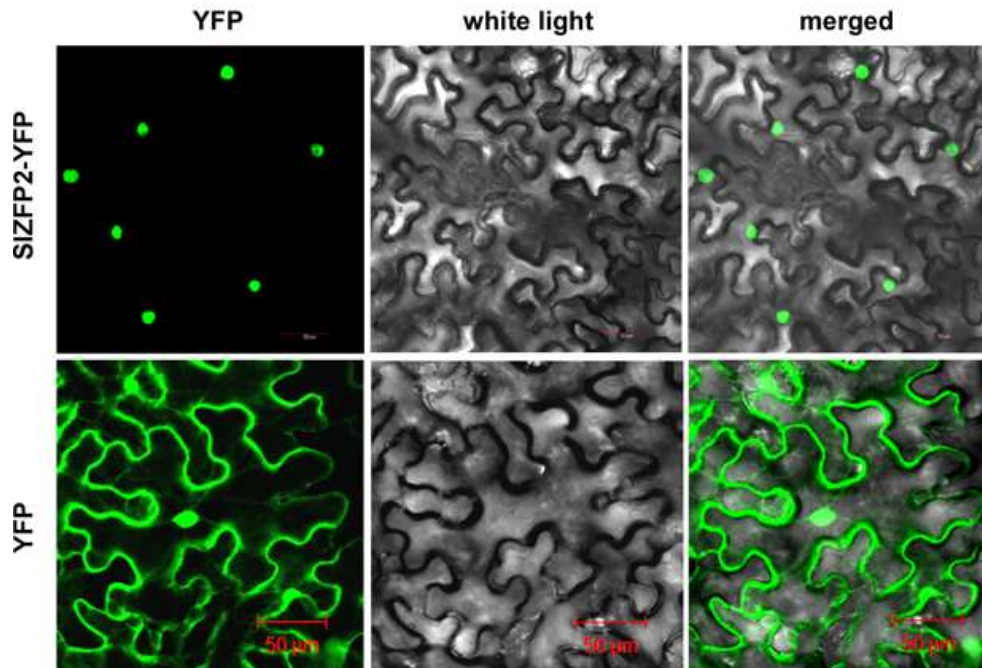

**Fig. S9 Subcellular localization of SIZFP2 protein.**

After infiltration with *A. tumefaciens* GV3101 containing the constructs, transient expression of SIZFP2-YFP fusion protein and YFP alone under 35S promoter in *N. benthamiana* leaves was monitored after three days post infiltration under confocal laser scanning microscope.

**A. *NOT* promoter (355bp)**

CAAAAAATGTAGGGACACCCACCCCTTCTCCCCACACCCACATGGGTCAT  
TTGTTGTATTAGTAGTAATATATAGTAGTAGTAAAGAGTTTAATCCTCCAA  
ATATGCATTTTTACATATCCAACACGTGGTCTTCTTTACATGTTAGAAG  
TGGACCATAATTCCACACTCTCCCCAACTCTATATATACAAATCCTCCCCT  
TCTCTCTTCTATAAACTCAACTCAA AAGGAACTAAACATAAACTCTCCT  
CATTTCCACCTCTTTTCTCTCTACAAAAAAAAAAATCCCCTTTCCACAAC  
ACCAAATTGTAATAAACATCCAAAAAA AAGAAAAAGA AAATAGGTAG  
CTATG

**B. *SIT* promoter (472bp)**

TACAAATGGAGGAAACACTGAAAAATGAAAAATCTTGAATACCCAATTG  
AAGTCAAGACTGGTCAGTGTATGCTTTTTTCAGCCTAAAGAACACATTTTTG  
CCTTGTTTGAAGTTTATTGCTTGACCCCGAATCTTGTTTGGAGTGTCTAA  
ATGGAGAAGGCACTGAAAAATGAAAAATCTTGAATAACCCAATTG AAGT  
CAAGATTGGTTAGTGTATATTTTTTCAGCCAAAA AACACAAAAAGATAAGT  
TTTTTTGCTTATTTGAAGTTTATTGCTTGACCCCGAATCTTGTTTGGAGT  
GTATAGATGGAGAAGGCACTGAAAAATGAAATCTTTTGAATACTCAATT  
G AAGTCAAGATTGGTATGTGTGCATTTTTTCAGCCAA AAGAACAGAAAAAG  
ACTAAGTTTTTTGGAGTACATTTAATTG AAGTTTGTGATTGAG AACAGA  
GTGTTGTITGGAGATTACAAATG

**C. *Solyc11g071620/SIAO1* promoter (838bp)**

AAAGTTAACTGTTTCAGCTAGCAATGA ACTTAACTATTCAAGA TTCTTGC  
TTTTTCTTTCATTTCTGTTATTTTTTCAGCTCAGTAGGTTGAAAAAAGTTG  
AAAAAGATGAGATTTTTGATAAAGGGTGTGTGTCAA AGTTAACTTCTTCA  
GTGTTTCAGCTAGCCAAGAATCATGATTGAAAAAGCTTTTAGACATCCAA  
TTCAATGATTCTTTTTTTTCAGTTCTGGTAATATTTTCAGCTCAGTATATAGA  
AAAATTTGAAAAAGATTGAGATTTTTGATAAAGGGTATGTGTCAAAGTC  
AACTGCTGTCAGTGTATAGCTAGATAAGAATTTTGATTCAAGAAGCTTTT  
G TGTAAAAAGTCAAGTTTGGGATACCAAATTTGTATAATTC AAGATTCT  
AGTTTTTTTTTCTAATTCTGGTAATTGTTTCAGCTCAGTAAGAGAAAAAAG  
TTGAAAAAATGTGTCATTGCTTCAGCTAGCCAAGAATCTTGATCTAAGAA  
GCTTTTGTGTA AAAAGTCAAGCTTTGGACACCCAATTCAAGATTCTTGTTT  
TTTTTTCCAGTTCTGGTAATTTTTTCAGCTCTGTA AGTTGAAAAAAGTTGA  
AAAAGA CTAGATTTTTGGTGAAAGGTATGTGTCAA AGTTAACTGCTTCAG  
TATTACAGCTAGCCAAGAATTTTTTATTC AACAACTTGTGTTAAAAAGTC  
AAGTTTGGGACTCCTAATTCAATTC AAGATTCAGTTTCTTCTTTCACTTCT  
GATATTTTAAAAGACAATATTTTTTTGTGAAGGAGCTAACCATAGAATTTT  
GATTTAAGGAGGCTATTGTAGTAATG

**D. *Solyc01g088170/SIAO2* (490bp)**

TGTGTATTTGGACACCCAATTCAATTC AAGATTCTTGCTTTTTTCTTTTCAG  
TTCTGATATTTTTTAGCTGAGG AAGTATGAAAACTATTTTGATAAAGGAT

TTGTGTCTATTTAATTGCTTCACAGTTTCAGCTAGCA AAGAATCTT GATCT  
CAG AAGTTCTT TGTGCTAAA AAGTAAGT ATTTGGACACCCAATTCA AGTT  
CAAGATTCTT GATTTTTCTGTC AGTTCTGTT ATTTTCCACCTGAGG AAGTA  
GAAAAGAAGTT GAAAAGATTAAGTTTTTGGAGACAGGGTTTACTAA AGT  
TAAGT GTTTCAGCTAACC AAGAATCTTGATTTAAGA AGCTTTTTG TGTGTA  
ACA GTAAATATTTGGAGACCAAAATCAATTCAAGGTTTCATGCTTTT TCTTT  
CAGTT GGGATATTGTTTCAGCTCAGG AAGTAGAAAAAAGATAAGA TTTTGA  
TAAAGGGACTATGTGAAAGGGGCTATTATATTA ATG

**E. *FLC* promoter (282bp)**

GCGCAATATTAACAATTTGTAAATAGAGGTGGCAACGATTGCCATTTCC  
ACGTGAAAAATGTCTTCAAATCTGACGACGTGCATCTCGCCGGTGTCTATA  
TTATAATGAATTCTTTTTGCCACCATAATATATC AACTAATTTAGTTTCTA  
AGA ATATTCTAGTAGTAGTATAATTTTTAATCGGCT AAGTAAGA GGAC  
ATAAAA AAGTGTGTTTTCTTCTT CATTCAATTTG AGTTTGTI CCGGGCTGA  
GTAAGAAATTCCAATCGCAACCGCTGCAA ATG

**F. *CNR* promoter (1475bp)**

AATGAGGAATATACAAATAAGGTCATTTTGGGGAACCATTAAGCTATAAA  
ACAATAATACACACTTATGAATTACCGATATATAATTTAATTTGGAATTTT  
ATTCATATGGTTAATAGC AACAGAGTTGTCTT TGTATTAGTGCACATCAA  
TTAATACCTAGCTGTGACACTAAAAGCTAGGTGCC ACAATTATTA  
ACAAAAGT GTATCCACCTC AAGAAGAAGA AAAAAGGCAAATATGATATA  
AAACCATTTAACAAAGTCCATATCACAAAATTAGACGGCAAATCATA  
ACGACTAATTTATAGATTCACTGAACCATGCAATTCTATACCGTTCCTTC  
CAATAAATAAAACATAATACTATGTTTAGAGTACAAGACTCTCCTTGC  
TTGAAAAGGACTACCAAGTAGGGGTTACTGCAGTACTACCAAGTAGGGG  
TACTGCAGTCATTTGTTAATTCATTTTGGAGTAATGT AACTGTGCAAGA TA  
ATGATGTTTTTTTTCTTTTTGGTT AACTAAGA TAATGATGGATTTAGGTA  
GATGAATTAGACATCTAGTGATAATGGAGAGCCAGTGCAACAATTGAGCA  
CTCTACTGGACCGACATGGACAACCTGAGAGACCAACTTGCAGTATTATA  
TAGTGCAAATTATAGTTTAGTCGACTCCCTTCGGAATCTACTACATA AAGA  
ACTACCATAAACTATGTT AGATGGCTATTACGG AGTTTAAATTAACCTCG  
AAAATATCAGAAAAAG AAGTAACTT CAACCAATTACAATGCATACCCTTA  
TCAC AAGTGAAAAAGA GTAAACGTGCCAAACTCTTTTGTATCCCTCCAAG  
CTAGAGGAAAAGAGTGAGCAATTCACTACAAACCACTGGCTTTGGTCTAT  
GGTTGACACAACCTCCTCGGCTAATTGGTCAAATATCTTGTGACCACCAA  
CCAGCAAGCACTAAATTGGATGTTCTATCAGCTTCTTTACATCATAAAACA  
GTGAATACTGAACGCTGAGAGGCTAACTGACTGCCCAAAAAA CTTGAC  
AAAAAGTTAGTGGAGTAACTACCTAGGAGTAAATTCATAGTAGACCTTG  
AA AAGA ACTTTAGCAAAGT CATCATAAATGCTCTTCACGTCTCATGACT  
ATGTTAAGGAATGGTCACATTTCTCTCTGCATTAAAGCT AGTTCATGTAA  
AAGTT GAGGCCGGTAGT AGTTTCAACT TTCAATTTAATTCCACCTTTCCTG  
GCCACTTCTGTACGGAACCAATCAGAA TCTTTAGTTCATCTTAACACC

AAAGCATCTCCACTTAGACACTTACTAGACTTACATAGGAGGAAAAATA  
TGGAAGTGGTGGTCCTCACAC**GT**ACTTACCTTTCTTTTTTACCTTTGTTCAAGTTTCATACTCTT  
TTATCTGGCTCCTCACTCTATTTTGGCCAAT**AGGTTCTCCTCACAGGGATG**GAAACTA

**Fig. S10 SIZFP2 binding sites found in the promoters of *NOT*, *SIT*, *SIAO1*, *SIAO2*, *FLC* and *CNR***

Promoter sequences of the ABA biosynthetic genes *NOT*, *SIT*, *SIAO1*, *SIAO2* and *FLC*, and the ripening regulator *CNR* were manually checked to identify SIZFP2 binding motifs. SIZFP2 binding motifs are highlighted in shade and the putative binding sites are boxed. Translation start codon ATG for each gene is boxed and bolded. Sequences in red are of the first *CNR* exon.

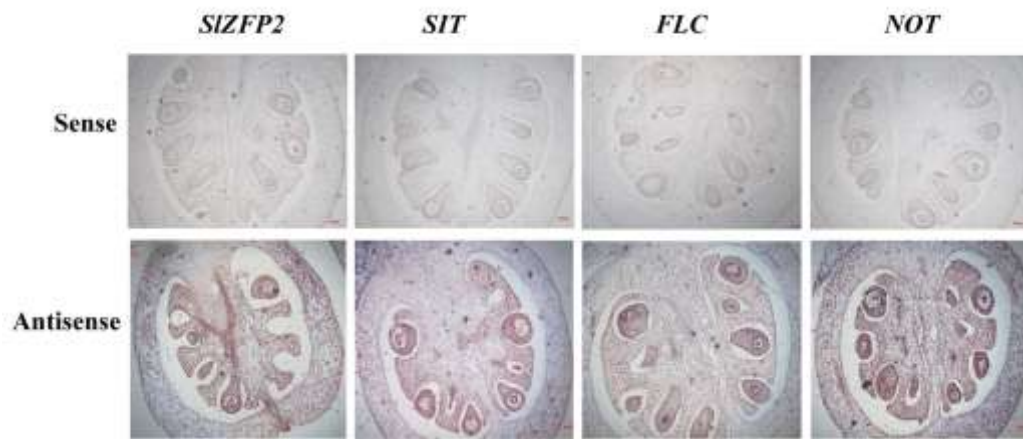

**Fig. S11 Expression of *SIZFP2* and the ABA biosynthetic genes revealed by *in situ* hybridization.**

*In situ* hybridization was performed on 5 dpa fruits of LA1589 with sense and antisense probes made from cDNA fragments of *SIZFP2* and the ABA biosynthetic genes *NOT*, *SIT* and *FLC*.
